# Supplementary material
Source: PubMed Central journal article supplement (PMC3051260)
Supplement: supp_tpc.110.078170_Supplemental_Data.pdf [file supp_tpc.110.078170_Supplemental_Data.pdf]

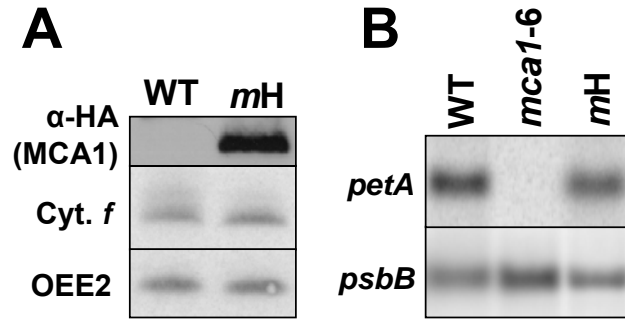

**Supplemental Figure 1.** Characterization of the *mca1-6* and *mH* strains.

A: MCA1-HA and cytochrome *f* accumulation assessed by immunoblots in the *mH* strain, compared to the wild-type control strain. The OEE2 from PSII was used as a loading control.

B: *petA* mRNA accumulation in the wild type, in the mutant strain *mca1-6* and in its complemented derivative *mH*. The *psbB* transcript serves as a loading control.

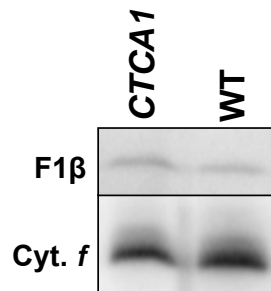

**Supplemental Figure 2.** Accumulation of cytochrome *f*, detected by immunoblot in the wild type and in the *CTCA1* strain (the *tca1-8* mutant complemented with the C-terminal domain of TCA1). F1 $\beta$  provides a loading control.

Supplemental Table 1: Oligonucleotides used in this study

| Name                          | Oligonucleotide sequence 5' to 3' <sup>1</sup>                            |
|-------------------------------|---------------------------------------------------------------------------|
| <i>petACod1</i>               | TTTATAAAGATCTTCCATGCATGAACTATG                                            |
| <i>petA<sub>Stop</sub>Rev</i> | <u>CAATTGGTTAG</u> <b>CTA</b> AATTTTATTAATCTTAAAACGAAACT<br>AGAATAAA      |
| <i>petA<sub>Stop</sub>Cod</i> | ATTAATAAAATT <b>TAG</b> TCTAAC <u>CAATTG</u> TTTACTACTTTACG<br>CGCAGCAACA |
| <i>petARev2</i>               | ACCTGGAAGCTGGACCAACAAC                                                    |
| Test_ <i>petA</i> _For        | CCTGCTCGTATTCAAGGTTTATTAG                                                 |
| Test_ <i>petA</i> _Rev        | AAATTAATTGGCAGCTAAATTGCCAAC                                               |
| <i>TCA1_EcoRI_814_dir</i>     | CGC <u>GAAATTC</u> ATGGCGCCCGCCTCCAACCTGCAC                               |
| <i>TCA1_1212_rev</i>          | TGCAGCCTGCTGCTGCTGCTGGGTTCGG                                              |
| <i>TCA1_EcoRV_dir</i>         | GGAAGCT <u>GATATCA</u> AAAAATGCTGCTGTCGCTGCAAAATGG                        |
| <i>MCA1_EcoRI_dir</i>         | CGC <u>GAAATTC</u> CCTATCACTGCAAGGCCGCCTATTC                              |
| <i>MCA1_AscI_SalI_rev</i>     | GCGG <u>TGCACAGCGC</u> ATTCGGAGATGAGGAC <u>GGCGCGCC</u>                   |
| <i>MBB1_dir_EcoRI-1</i>       | CC <u>GAAATTC</u> ATGAGCTTGGTGCCCTTCTC                                    |
| <i>MBB1_rev_410</i>           | CTTACGCTCATTC AAGTCAA                                                     |
| MCA1cod3                      | GTCTCTGGCTTCAGCGCTGGTGCT                                                  |
| MCA1rev3                      | GAACTGAATTCCCAACACGGGGAAG                                                 |

<sup>1</sup> restriction sites, underlined in the sequences of the oligonucleotides, were used for the construction of plasmids and/or RFLP analysis of transformed strains. Nucleotides indicated in bold differ from the wild type gene sequence. The Stop codon, replacing the initiation codon, is boxed.
